# Supplementary material for: Structural and magnetic studies on three new mixed metal copper(ii) selenites and tellurites
Source: Royal Society of Chemistry journal article supplement (doi:10.1039/c5dt01257k), 2015-01-01
Supplement: c5dt01257k1.pdf [file c5dt01257k1.pdf]

## Structural and Magnetic Studies on Three New Mixed Metal Copper(II) Selenites and Tellurites

Xue-Li Cao, Fang Kong, Zhang-Zhen He, and Jiang-Gao Mao\*

### Supporting Information

Table S1. IR data for  $\text{CdCu}(\text{SeO}_3)_2$ ,  $\text{HgCu}(\text{SeO}_3)_2$  and  $\text{Hg}_2\text{Cu}_3(\text{Te}_3\text{O}_8)_2$ .

Figure S1. Simulated and experimental XRD powder patterns of  $\text{CdCu}(\text{SeO}_3)_2$  (a),  $\text{HgCu}(\text{SeO}_3)_2$  (b) and  $\text{Hg}_2\text{Cu}_3(\text{Te}_3\text{O}_8)_2$  (c).

Figure S2. A 1D  $[\text{Cu}_2\text{O}_4(\text{SeO}_3)_2]^{8-}$  anionic chain along the  $a$  axis (a), a 2D  $[\text{Cu}_2\text{O}_6(\text{SeO}_3)]^{10-}$  layer parallels to the  $bc$  plane (b), and the coordination geometries around Cu (c), Hg (d), Se(1) (e) and Se(2) (f) atoms in  $\text{Hg}_2\text{Cu}_3(\text{Te}_3\text{O}_8)_2$ .

Figure S3. TGA and DSC curves of  $\text{CdCu}(\text{SeO}_3)_2$  (a),  $\text{HgCu}(\text{SeO}_3)_2$  (b) and  $\text{Hg}_2\text{Cu}_3(\text{Te}_3\text{O}_8)_2$  (c).

Figure S4. IR spectra of  $\text{CdCu}(\text{SeO}_3)_2$  (a),  $\text{HgCu}(\text{SeO}_3)_2$  (b) and  $\text{Hg}_2\text{Cu}_3(\text{Te}_3\text{O}_8)_2$  (c).

Figure S5. UV-Vis absorption spectra of  $\text{CdCu}(\text{SeO}_3)_2$  (a),  $\text{HgCu}(\text{SeO}_3)_2$  (b) and  $\text{Hg}_2\text{Cu}_3(\text{Te}_3\text{O}_8)_2$  (c).

Figure S6. Optical diffuse reflectance spectra of  $\text{CdCu}(\text{SeO}_3)_2$  (a),  $\text{HgCu}(\text{SeO}_3)_2$  (b) and  $\text{Hg}_2\text{Cu}_3(\text{Te}_3\text{O}_8)_2$  (c).

Figure S7. Plot of  $\chi T$  versus  $T$  for  $\text{HgCu}(\text{SeO}_3)_2$ .

Figure S8. Plot of  $\chi T$  versus  $T$  (a), and magnetization versus applied field at 2 K (b) as

well as heat capacity measured in zero magnetic fields (the inset) for  $\text{CdCu}(\text{SeO}_3)_2$ .

Figure S9. Plot of  $\chi T$  versus  $T$  for  $\text{Hg}_2\text{Cu}_3(\text{Te}_3\text{O}_8)_2$ .

Table S1. IR data for  $\text{CdCu}(\text{SeO}_3)_2$ ,  $\text{HgCu}(\text{SeO}_3)_2$  and  $\text{Hg}_2\text{Cu}_3(\text{Te}_3\text{O}_8)_2$ .

|                                                   | $\nu(\text{Te/Se-O})$ | $\nu(\text{Te/Se-O-Te/Se})$ |
|---------------------------------------------------|-----------------------|-----------------------------|
| $\text{Hg}_2\text{Cu}_3(\text{Te}_3\text{O}_8)_2$ | 755, 681, 647         | 509, 443                    |
| $\text{HgCu}(\text{SeO}_3)_2$                     | 796, 717, 671         | 522, 492, 432               |
| $\text{CdCu}(\text{SeO}_3)_2$                     | 809, 750, 706         | 538, 496, 405               |

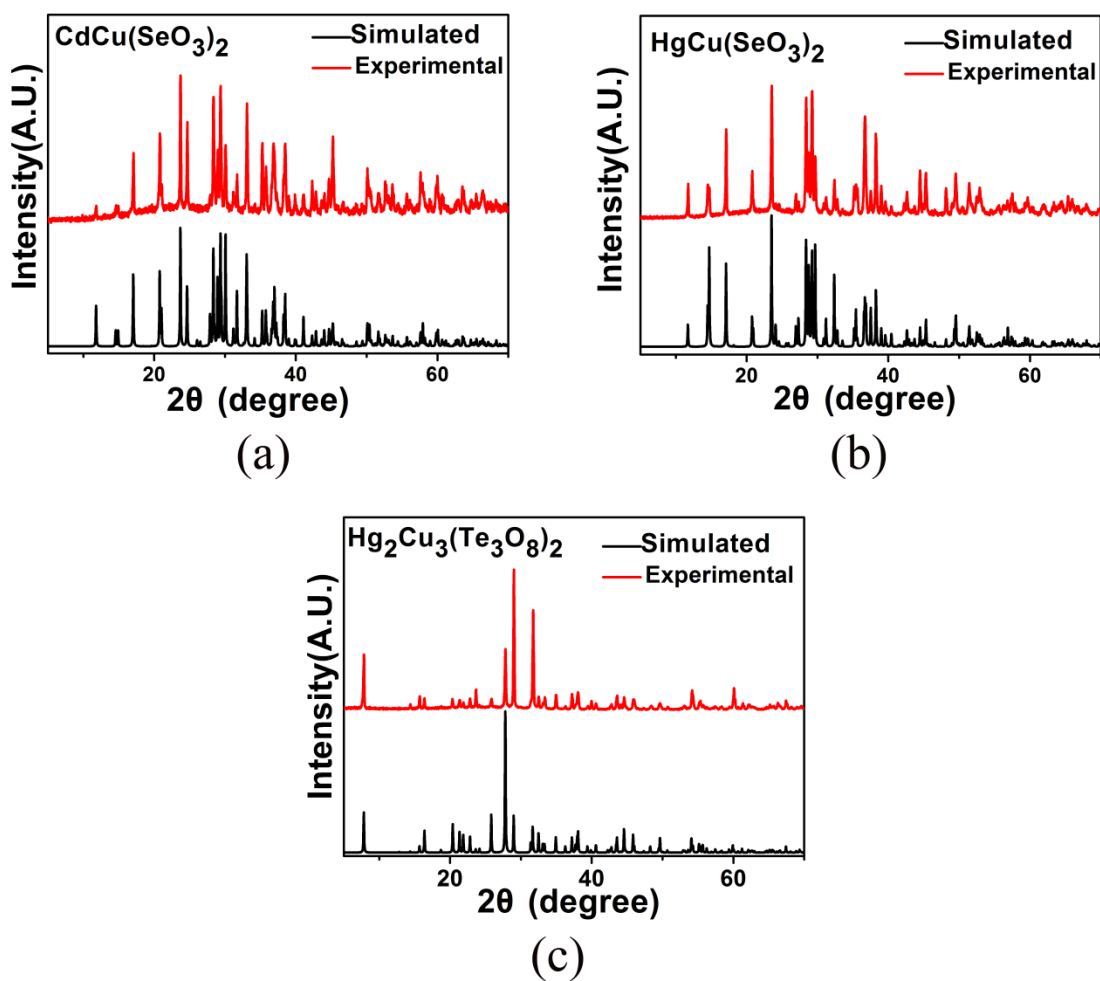

Figure S1. Simulated and experimental XRD powder patterns of  $\text{CdCu}(\text{SeO}_3)_2$  (a),  $\text{HgCu}(\text{SeO}_3)_2$  (b) and  $\text{Hg}_2\text{Cu}_3(\text{Te}_3\text{O}_8)_2$  (c).

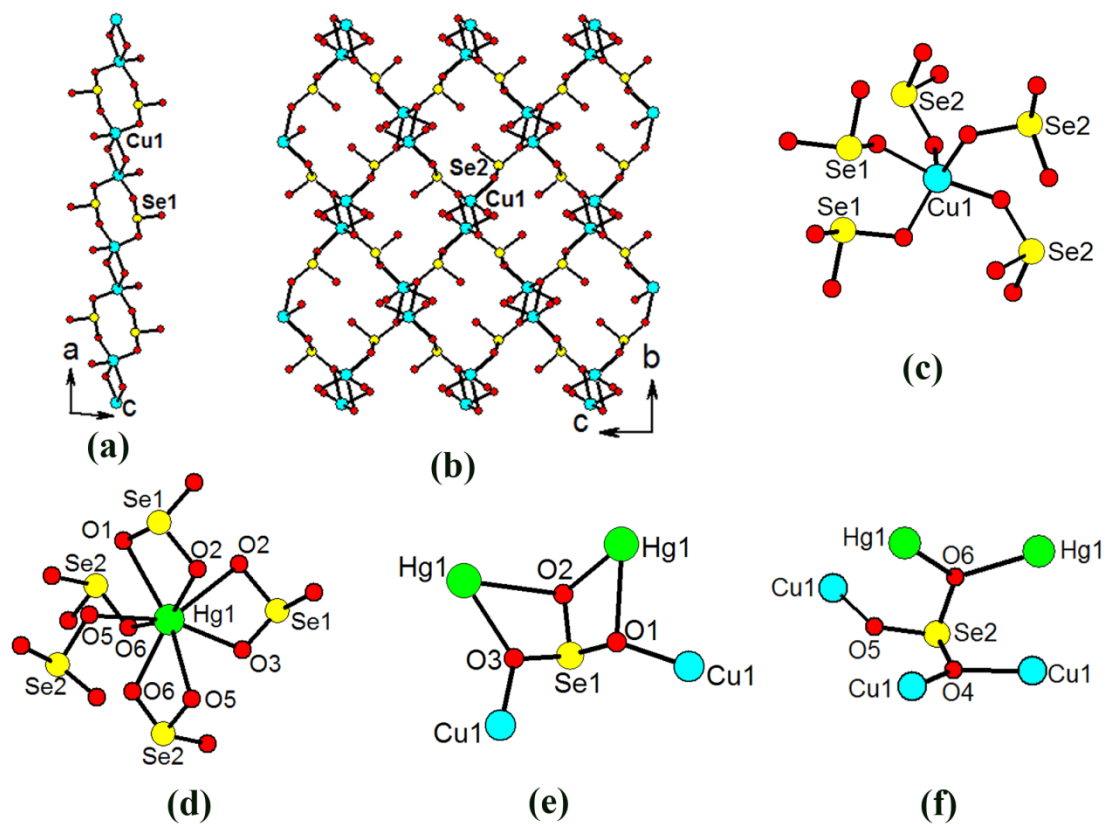

Figure S2. A 1D  $[\text{Cu}_2\text{O}_4(\text{SeO}_3)_2]^{8-}$  anionic chain along the  $a$  axis (a), a 2D  $[\text{Cu}_2\text{O}_6(\text{SeO}_3)]^{10-}$  layer parallels to the  $bc$  plane (b), and the coordination geometries around Cu (c), Hg (d), Se(1) (e) and Se(2) (f) atoms in  $\text{Hg}_2\text{Cu}_3(\text{Te}_3\text{O}_8)_2$ .

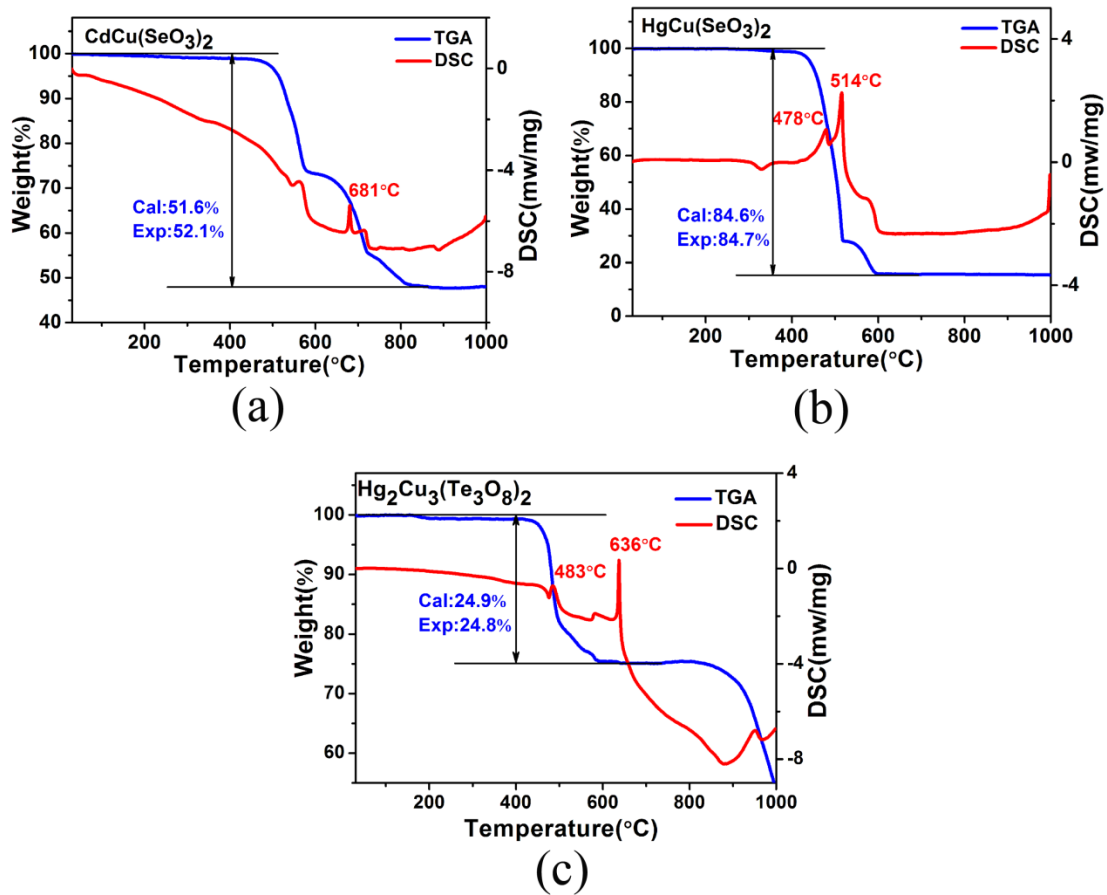

Figure S3. TGA and DSC curves of  $\text{CdCu}(\text{SeO}_3)_2$  (a),  $\text{HgCu}(\text{SeO}_3)_2$  (b) and  $\text{Hg}_2\text{Cu}_3(\text{Te}_3\text{O}_8)_2$  (c).

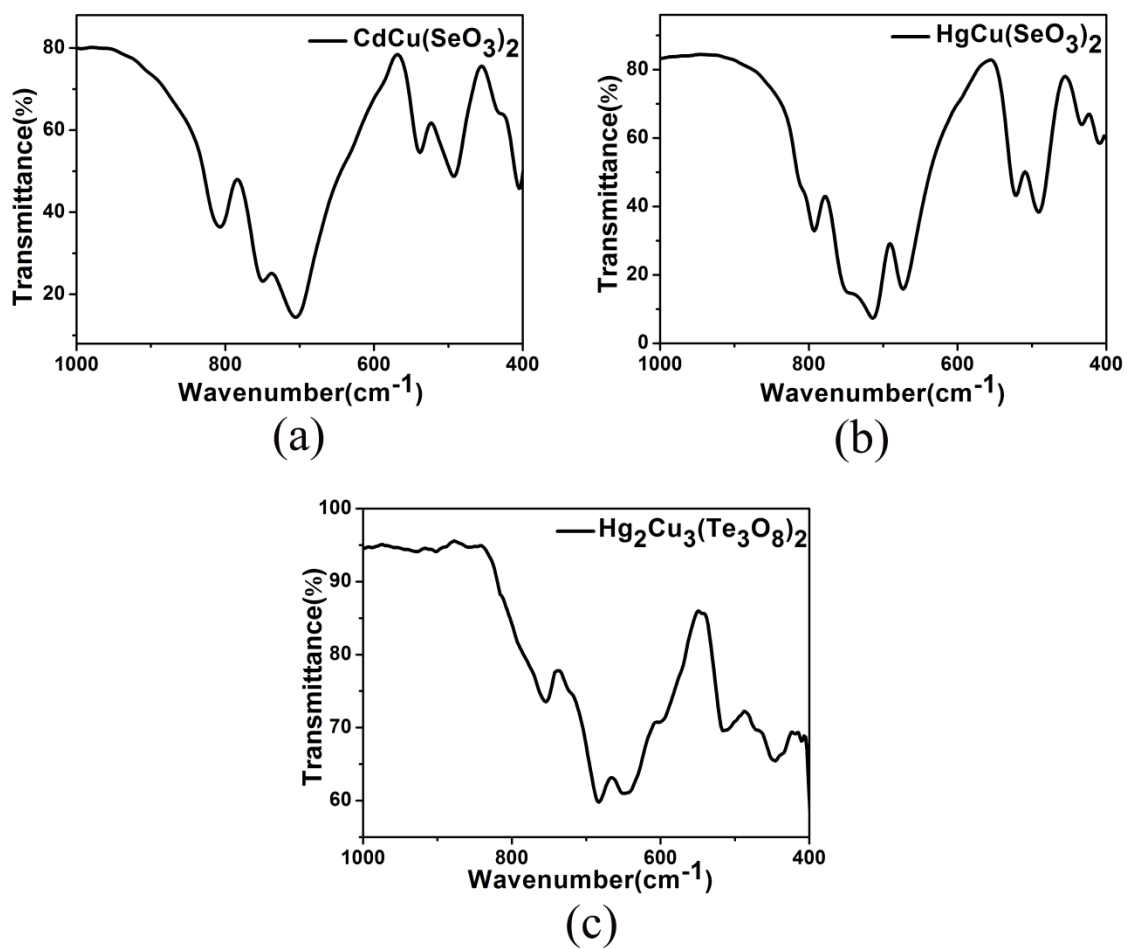

Figure S4. IR spectra of CdCu(SeO<sub>3</sub>)<sub>2</sub> (a), HgCu(SeO<sub>3</sub>)<sub>2</sub> (b) and Hg<sub>2</sub>Cu<sub>3</sub>(Te<sub>3</sub>O<sub>8</sub>)<sub>2</sub> (c).

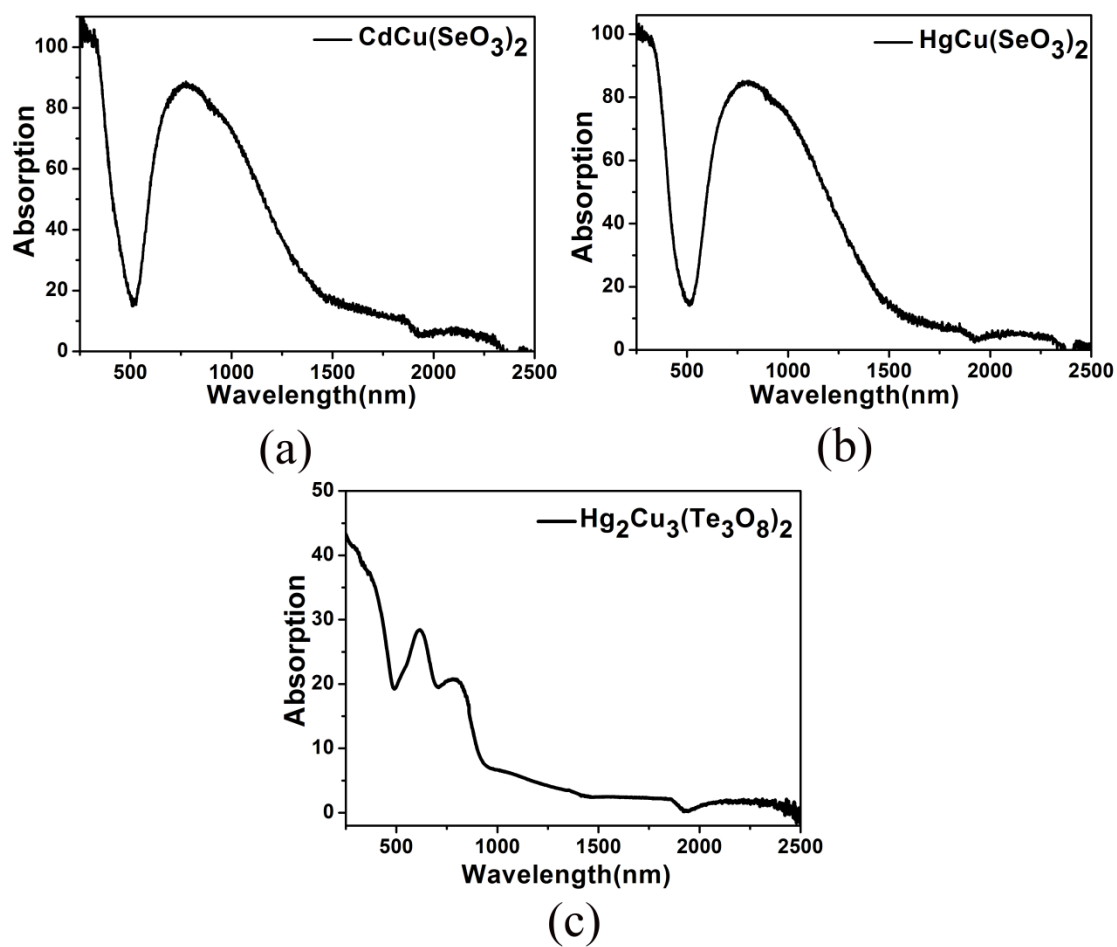

Figure S5. UV-Vis absorption spectra of  $\text{CdCu}(\text{SeO}_3)_2$  (a),  $\text{HgCu}(\text{SeO}_3)_2$  (b), and  $\text{Hg}_2\text{Cu}_3(\text{Te}_3\text{O}_8)_2$  (c).

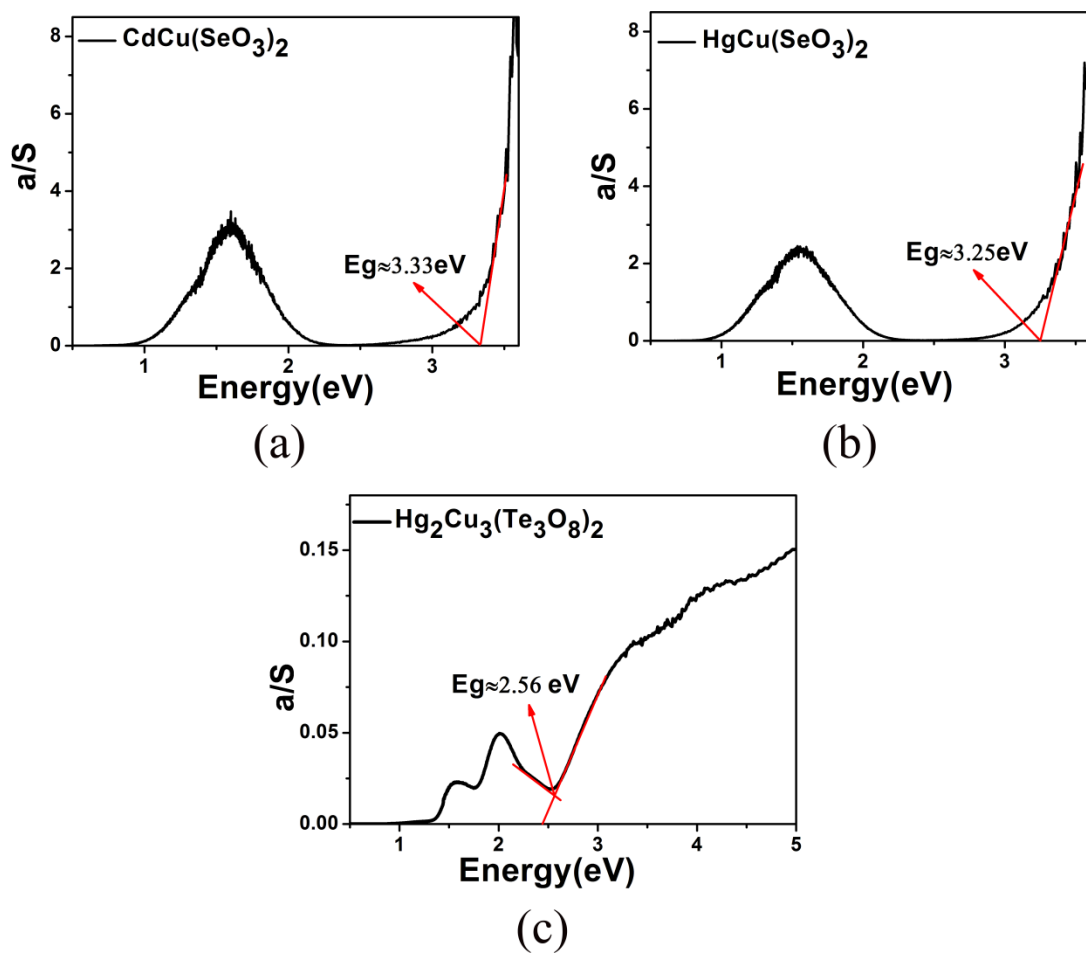

Figure S6. Optical diffuse reflectance spectra of  $\text{CdCu}(\text{SeO}_3)_2$  (a),  $\text{HgCu}(\text{SeO}_3)_2$  (b) and  $\text{Hg}_2\text{Cu}_3(\text{Te}_3\text{O}_8)_2$  (c).

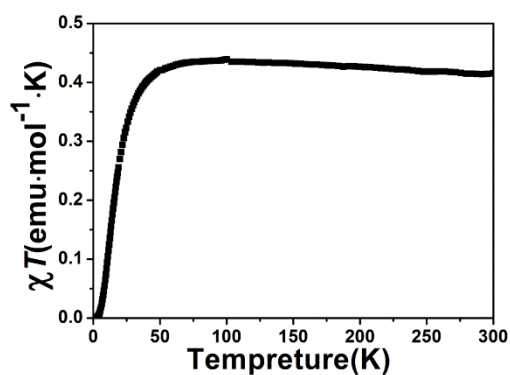

Figure S7. Plot of  $\chi T$  versus  $T$  for  $\text{HgCu}(\text{SeO}_3)_2$ .



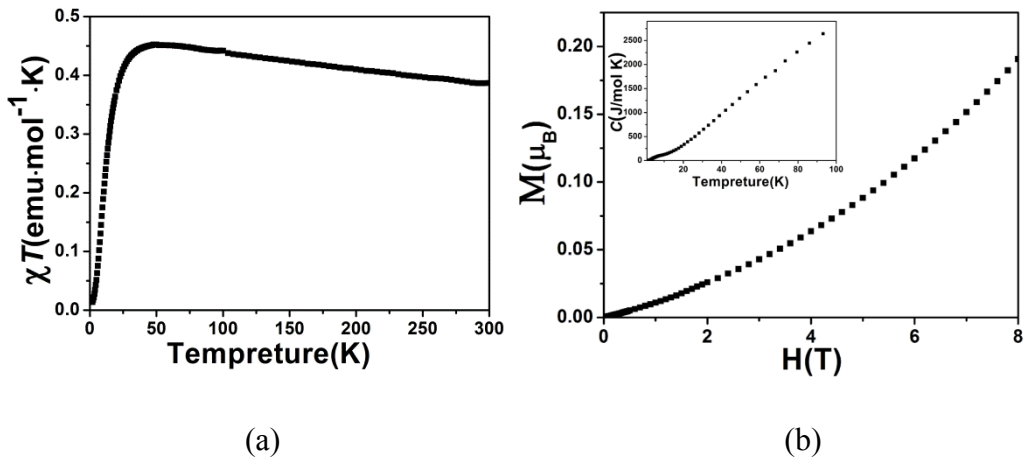

Figure S8. Plot of  $\chi T$  versus  $T$  (a), and magnetization versus applied field at 2 K (b) as well as heat capacity measured in zero magnetic fields (the inset) for  $\text{CdCu}(\text{SeO}_3)_2$ .

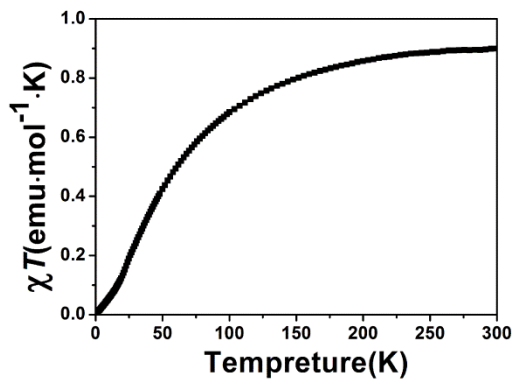

Figure S9. Plot of  $\chi T$  versus  $T$  for  $\text{Hg}_2\text{Cu}_3(\text{Te}_3\text{O}_8)_2$ .
